# Supplementary material
Source: Royal Society of Chemistry journal article supplement (doi:10.1039/d6an00315j)
Supplement: d6an00315j1.pdf [file d6an00315j1.pdf]

## Electronic supplementary information

### Reusable interface-decoupled organic photoelectrochemical transistor biosensing for acetylcholinesterase activity and its inhibitor detection

Huijin Lin<sup>a,b,c</sup>, Huihui Cai<sup>b</sup>, Hua-Yue Xiong<sup>b</sup>, Jinting Sun<sup>b</sup>, De-Man Han<sup>b,\*</sup>, Feng-Zao Chen<sup>b,\*</sup>,  
Chaobiao Huang<sup>a,c,\*</sup>

<sup>a</sup>Xingzhi College, Zhejiang Normal University, Lanxi, 321100, China

<sup>b</sup>Zhejiang Key Laboratory of New Drug Development for Central Nervous System Diseases, Taizhou  
University, Zhejiang 318000, China

<sup>c</sup>College of Chemistry and Materials Science, Zhejiang Normal University, Jinhua 321004, China

\*Corresponding Authors: E-mails: hdmztc@126.com (De-Man Han); chenfengzao@tzc.edu.cn (Feng-  
Zao Chen); hcb@zjnu.cn (Chao-Biao Huang)

## TABLE OF CONTENTS

|                           |    |
|---------------------------|----|
| Experimental Section..... | S3 |
| Fig. S1 .....             | S4 |
| Fig. S2.....              | S4 |
| Fig. S3 .....             | S5 |
| Fig. S4.....              | S5 |
| Fig. S5.....              | S5 |
| Fig. S6.....              | S6 |
| Table S1 .....            | S6 |
| Table S2.....             | S7 |
| References.....           | S8 |

## Experimental Section

**Reagents and Materials.** All solvents and reagents were commercially available and used without further purification, unless for special needs. Acetylcholinesterase (AChE), choline oxidase (ChOx), soluble starch, amyloglucosidase (AG), and zinc chloride ( $\text{ZnCl}_2$ ) were purchased from Macklin Biochemical Company (Shanghai, China). Acetylcholine chloride (ACh), potassium iodide (KI), chlorpyrifos (CPF), glyphosate (GLY), urea, oxytetracycline base (OTC-base), 2,4-dichlorophenoxyacetic acid (2,4-D), ascorbic acid (AA), and thioacetamide were obtained from Aladdin Reagent Company (Shanghai, China). Horseradish peroxidase (HRP), alkaline phosphatase (ALP), glucose oxidase (GOx), and biological PBS buffer (10 mM, pH 7.2-7.6) were sourced from Sangon Biotech Company (Shanghai, China). Tetracycline hydrochloride (TC-HCl) and lysozyme (LYZ) were acquired from Energy Chemical Company (Shanghai, China). Leucine aminopeptidase (LAP) was procured from Yuanye Bio-Technology Company (Shanghai, China). Indium (III) chloride ( $\text{InCl}_3$ ) was purchased from Adamas Reagent Company (Shanghai, China).

**Instruments.** Photoelectrochemical (PEC) and organic photoelectrochemical transistor (OPECT) detection were performed using a PEC/OECT detector (Nandaguang, Nanjing, China). Scanning electron microscopy (SEM) images were acquired using an S-4800 microscope (Hitachi, Japan). Transmission electron microscopy (TEM) images were obtained with a Thermo Scientific Talos F200i instrument (Thermo Fisher Scientific, Australia). X-ray diffraction (XRD) patterns were recorded on an Ultima IV diffractometer (Rigaku, Japan) with copper  $K\alpha$  radiation over the  $2\theta$  range of  $25^\circ$  to  $70^\circ$ . A Thermo Scientific K-Alpha X-ray photoelectron spectrometer (Thermo Electron, USA) was used to collect X-ray photoelectron spectroscopy (XPS) spectra. UV-vis absorbance spectroscopy and UV-Vis diffuse reflectance spectroscopy (UV-vis DRS) were recorded on a Cary 60 UV-vis spectrophotometer (Agilent Technologies, USA) and a UV-3600i Plus UV-Vis-NIR spectrophotometer (Shimadzu, Japan), respectively. Luminous power was measured using a PLS-MW2000 Luminous power meter (Perfectlight Technology, Beijing, China).

**Synthesis of  $\text{ZnIn}_2\text{S}_4$ .** The synthesis of  $\text{ZnIn}_2\text{S}_4$  was performed following a modified procedure.<sup>1</sup> Briefly,  $\text{ZnCl}_2$  (0.0682 g, 0.5 mmol),  $\text{InCl}_3$  (0.2212 g, 1 mmol), and  $\text{C}_2\text{H}_5\text{NS}$  (0.1503 g, 2 mmol) were dissolved in 45 mL of ultrapure water and stirred at  $25^\circ\text{C}$  for 1 h. The solution was transferred to a Teflon autoclave, and several FTO substrates ( $25\times 8$  mm) were placed vertically within the autoclave. Then the autoclave was sealed and maintained at  $160^\circ\text{C}$  for 4 h. After cooling, the samples were rinsed thoroughly with ultrapure water and ethanol, dried at room temperature, and finally annealed at  $200^\circ\text{C}$  for 2 h.

### Device Testing.

PEC and OPECT measurements were performed in PBS containing 10 mM AA. A gate with an effective area of  $19.63\text{ mm}^2$  and a white light source (5 W) with 420 nm filter were employed for signal excitation. PEC characterization utilized a standard three-electrode system comprising an Ag/AgCl reference electrode, Pt wire counter electrode, and sample/FTO working electrode, with responses recorded at 0 V relative Ag/AgCl. Transistor characterization involved acquiring  $I_D$ - $V_D$  output curves through  $V_G$  sweeps from 0 to 0.6 V at fixed  $V_D = 0.1$  V, and determining the  $I_D$ -time and  $I_D$ - $V_G$  curves.

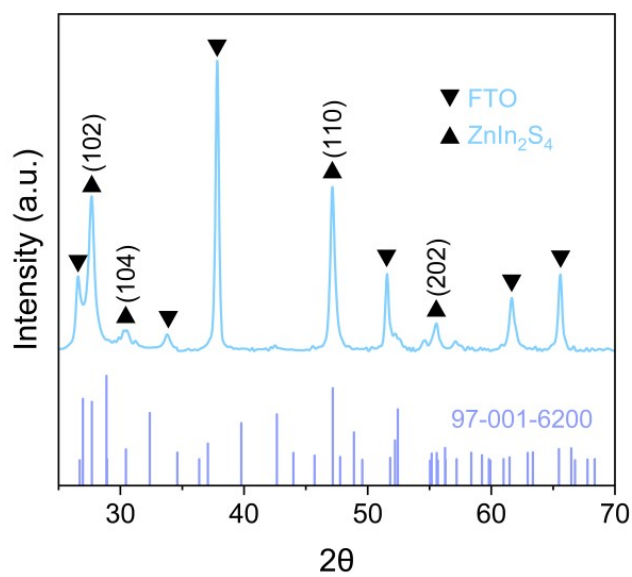

Fig. S1 XRD patterns of  $\text{ZnIn}_2\text{S}_4$ .

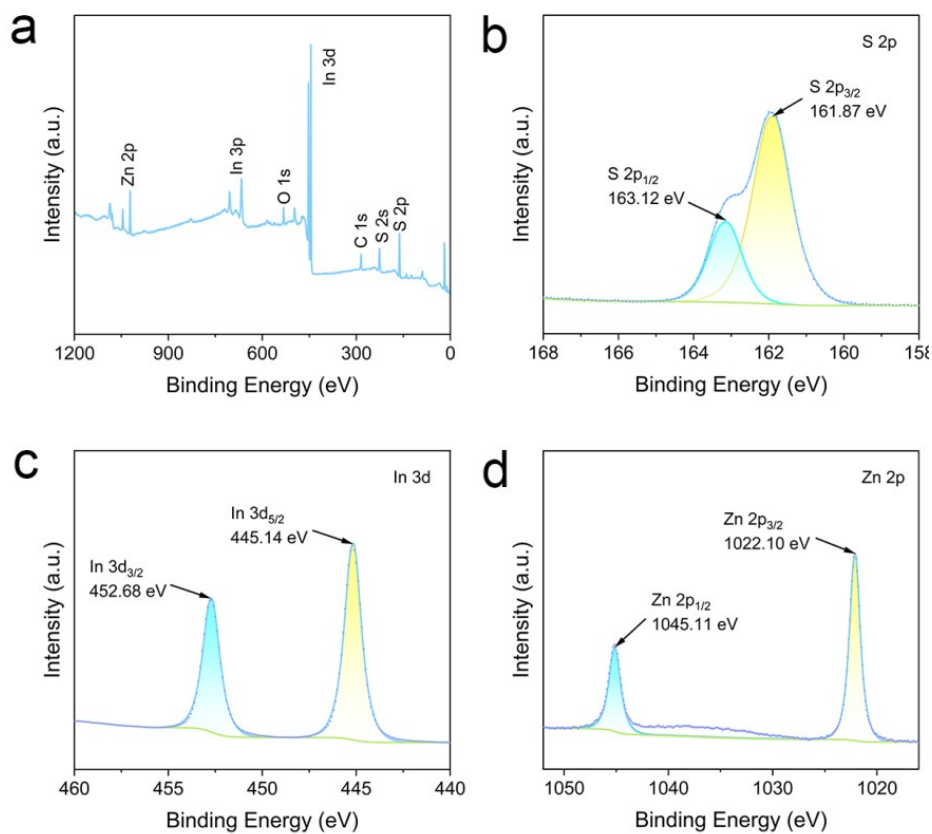

Fig. S2 XPS spectra of (a) survey-scan, (b) S 2p, (c) In 3d, and (d) Zn 2p for  $\text{ZnIn}_2\text{S}_4$ .

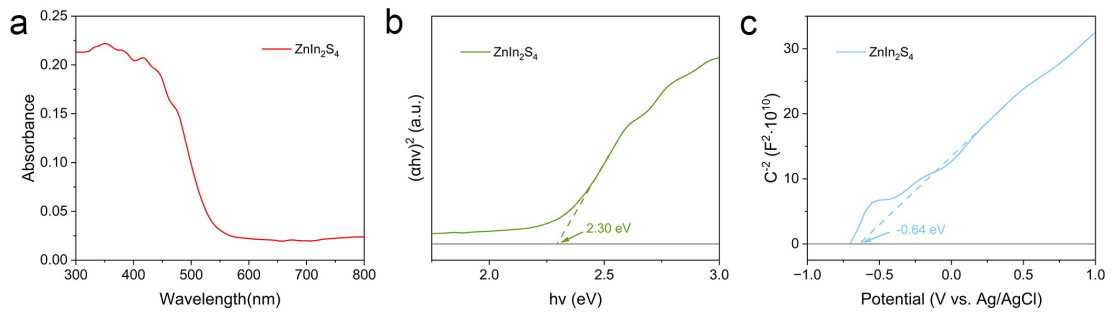

Fig. S3 (a) UV-vis DRS of ZnIn<sub>2</sub>S<sub>4</sub>. (b) Plots of  $(\alpha hv)^2$  against photon energy ( $h\nu$ ), and (c) Mott-Schottky plots of ZnIn<sub>2</sub>S<sub>4</sub>.

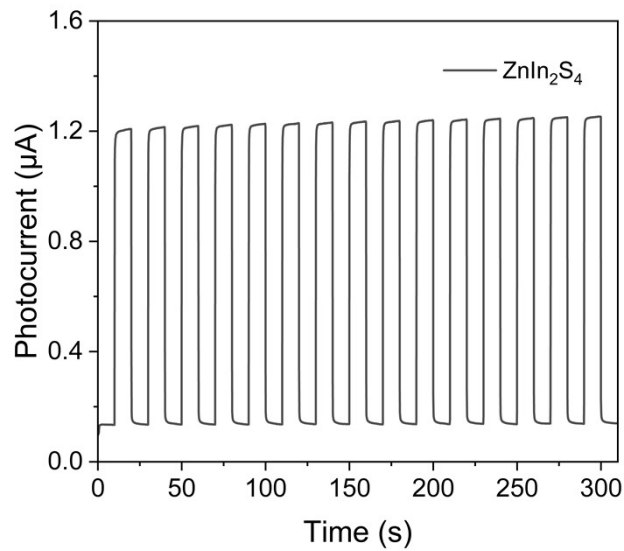

Fig. S4 Stability tests of ZnIn<sub>2</sub>S<sub>4</sub> electrode.

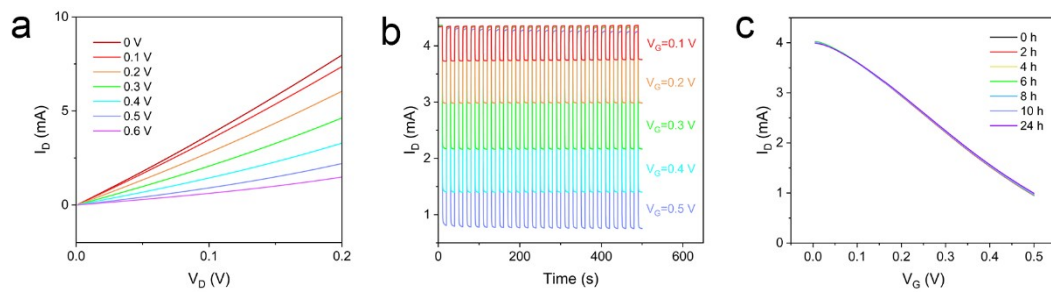

Fig. S5 (a) Output curves measured at different  $V_G$ . (b) Transient  $I_D$  responses at different  $V_G$  over 500 s. (c) Transfer curves measured at different time intervals.

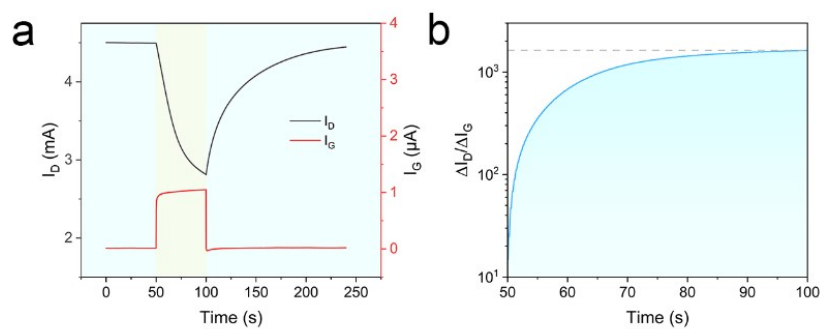

Fig. S6 (a) The transient  $I_D$  and  $I_G$  responses of  $ZnIn_2S_4$ -gated OPECT with the light on/off, and (b) corresponding current gain. ( $\Delta I_D/\Delta I_G$ , where  $\Delta I_D$  and  $\Delta I_G$  are defined as the changed  $I_D$  and  $I_G$  signals upon light on/off).

Table S1 Evaluation of various biosensors for AChE analysis.

| Method          | Materials                             | Linear range<br>( $U \cdot L^{-1}$ ) | LOD<br>( $U \cdot L^{-1}$ ) | Reference |
|-----------------|---------------------------------------|--------------------------------------|-----------------------------|-----------|
| Electrochemical | PDA@dsPD                              | 0-300                                | 69                          | 2         |
| Colorimetric    | $\mu$ PAD                             | 100-1000                             | 9                           | 3         |
| Fluorometric    | DCM-N                                 | 200-1600                             | 60                          | 4         |
| Fluorometric    | CyN                                   | 0-8000                               | 117                         | 5         |
| Fluorometric    | Naph-3                                | 0-1000                               | 100                         | 6         |
| OPECT           | $I_2$ -starch<br>complex/ $ZnIn_2S_4$ | 20-200                               | 15                          | This work |

Table S2 Evaluation of various biosensors for CPF analysis.

| Method          | Materials                                                       | Linear range (ppb)  | LOD (ppb) | Reference |
|-----------------|-----------------------------------------------------------------|---------------------|-----------|-----------|
| Electrochemical | CuO/SA-g-PANI                                                   | 350-42000           | 131       | 7         |
| Electrochemical | CPSaptasensor                                                   | 0-100               | 10        | 8         |
| Fluorometric    | dye@ALB                                                         | 0-70000             | 200       | 9         |
| Colorimetric    | Ag-NanoZyme                                                     | 35000-210000        | 11300     | 10        |
| Colorimetric    | $\gamma$ -Fe <sub>2</sub> O <sub>3</sub> /t-SG                  | 500-10 <sup>6</sup> | 170       | 11        |
| OPECT           | I <sub>2</sub> -starch complex/ZnIn <sub>2</sub> S <sub>4</sub> | 30-180              | 16        | This work |

## References

1. F.-Z. Chen, Y. Gao, Y.-J. Li, W. Li, X.-Y. Wu, D.-M. Han and W.-W. Zhao, *Sensors and Actuators B: Chemical*, 2022, **361**.
2. S. G. Kim, B. Ryplida, H. J. Jo, G. Lee and S. Y. Park, *Chemical Engineering Journal*, 2023, **452**.
3. J. Xu, C. Tong, Y. Cao, Z. Qin, C. Liao, Y. Chen, S. Shi and Y. Guo, *Sensors and Actuators B: Chemical*, 2024, **401**.
4. K. Zeng, F. Fan, Y. Tang, X. Wang, D. Lv, J. Lin, Y. Zhang, Y. Zhu, Y. Chai, X. Chen and Q. Li, *Journal of Pharmaceutical Analysis*, 2025, **15**, 101204.
5. J. Ma, T. Si, C. Yan, Y. Li, Q. Li, X. Lu and Y. Guo, *ACS Sensors*, 2020, **5**, 83-92.
6. J. S. Sidhu, K. Rajendran, A. B. Mathew, T. Iqbal, D. K. Saini and D. Das, *Analytical Chemistry*, 2023, **95**, 7594-7602.
7. C. S. Kushwaha, N. S. Abbas and S. K. Shukla, *International Journal of Biological Macromolecules*, 2022, **217**, 902-909.
8. W. Ruankham, T. Tantimongcolwat, K. Phopin, J. Bausells, M. Hangouët, M. Martin, N. Zine and A. Errachid, *Sensors and Actuators B: Chemical*, 2022, **372**.
9. M. Zhang, Z. Chen, X. Liu, C. Song, C. Zeng, T. Lv, Z. Xu, X. Chen, L. Wang, B. Liu and X. Peng, *Journal of Hazardous Materials*, 2023, **452**.
10. P. Weerathunge, B. K. Behera, S. Zihara, M. Singh, S. N. Prasad, S. Hashmi, P. R. D. Mariathomas, V. Bansal and R. Ramanathan, *Analytica Chimica Acta*, 2019, **1083**, 157-165.
11. Y. Yan, Y. Ge, H. Mao, Q. Wang, Q. Li and H. Li, *Journal of Environmental Chemical Engineering*, 2024, **12**.
